# Supplementary material for: circ-SHKBP1 Regulates the Angiogenesis of U87 Glioma-Exposed Endothelial Cells through miR-544a/FOXP1 and miR-379/FOXP2 Pathways
Source: PubMed Central journal article supplement — Mol Ther Nucleic Acids. 2017 Dec 30;10:331–48. doi: 10.1016/j.omtn.2017.12.014 (PMC5862134; doi:10.1016/j.omtn.2017.12.014), 2017-12-30
Supplement: mmc1.pdf [file mmc1.pdf]

OMTN, Volume 10

## **Supplemental Information**

**circ-SHKBP1 Regulates the Angiogenesis of U87**

**Glioma-Exposed Endothelial Cells through**

**miR-544a/FOXP1 and miR-379/FOXP2 Pathways**

**Qianru He, Lini Zhao, Yunhui Liu, Xiaobai Liu, Jian Zheng, Hai Yu, Heng Cai, Jun Ma, Libo Liu, Ping Wang, Zhen Li, and Yixue Xue**

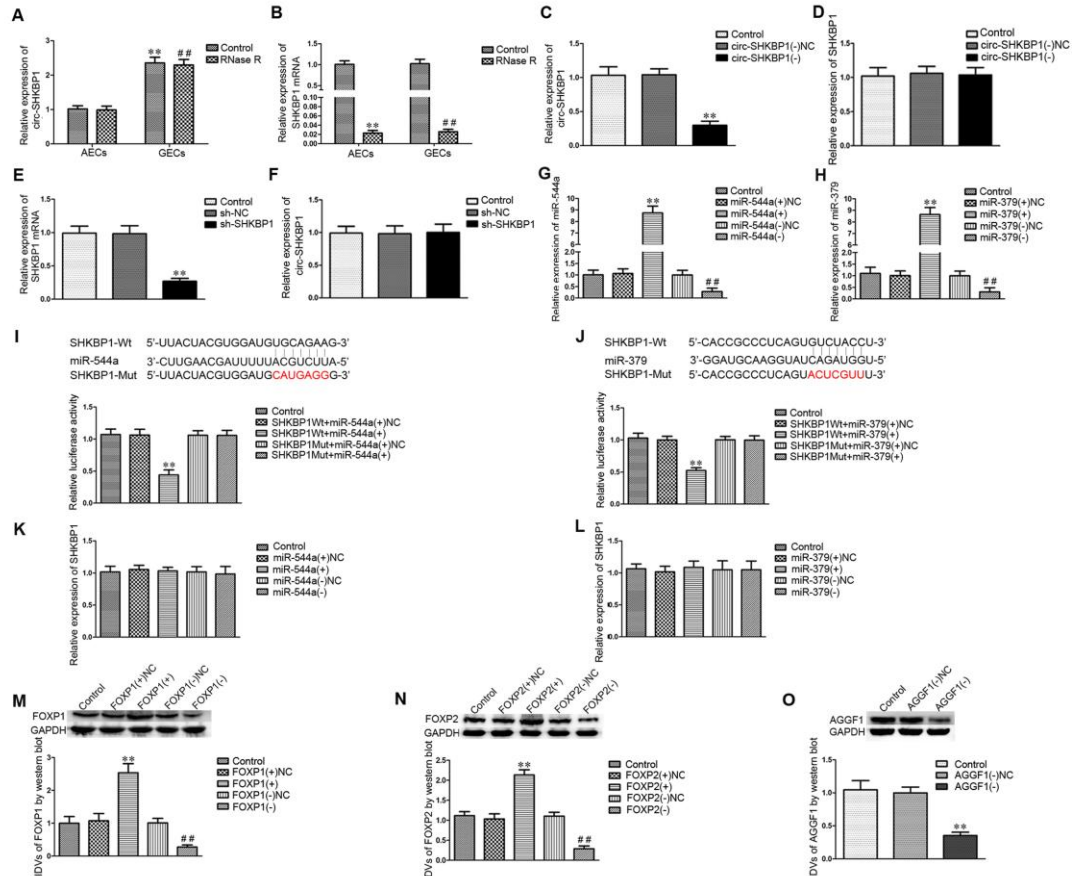

**Figure S1** Correlation between SHKBP1 and miR-544a/miR-379 as well as the transfection efficiency of circ-SHKBP1, SHKBP1, miR-544a/miR-379, FOXP1/FOXP2 and AGGF1 were evaluated. (A) The expression of circ-SHKBP1 in GECs with RNase R treatment. Data represent means  $\pm$  SD ( $n = 5$ , each group). \*\**P* < 0.01 versus control group in AECs; ##*P* < 0.01 versus RNase R group in AECs. (B) The mRNA expression of SHKBP1 in GECs with RNase R treatment. Data represent means  $\pm$  SD ( $n = 5$ , each group). \*\**P* < 0.01 versus control group in AECs; ##*P* < 0.01 versus control group in GECs. (C) The transfection efficiency of circ-SHKBP1 knockdown was detected by qRT-PCR. Data represent means  $\pm$  SD ( $n = 5$ , each group). \*\**P* < 0.01 versus circ-SHKBP1 (-) NC group. (D) The expression of SHKBP1 was measured after knockdown of circ-SHKBP1. Data represent means  $\pm$  SD ( $n = 5$ , each group). (E) The mRNA expression of SHKBP1 was detected by qRT-PCR after SHKBP1 knockdown. Data represent means  $\pm$  SD ( $n = 5$ , each group). \*\**P* < 0.01 versus sh-NC group. (F) The expression of circ-SHKBP1 was measured after knockdown of SHKBP1. Data represent means  $\pm$  SD ( $n = 5$ , each group). (G and H) The transfection efficiency of miR-544a (G) and miR-379 (H) agomir or antagomir were evaluated by qRT-PCR. Data represent means  $\pm$  SD ( $n = 5$ , each group). \*\**P* < 0.01 versus miR-544a/miR-379 (+) NC group, ##*P* < 0.01 versus miR-544a/miR-379 (-) NC group. (I and J) The binding sites between SHKBP1 and miR-544a (I) or miR-379 (J) were predicted, and the relative luciferase activity was evaluated in HEK293T cells. Data represent means  $\pm$  SD ( $n = 5$ , each group). \*\**P* < 0.01 versus SHKBP1 Wt + miR-544a/miR-379 (+) NC group. (K and L) The relative SHKBP1 expression was detected by qRT-PCR after miR-544a (K) and miR-379 (L) overexpression or silencing. Data represent means  $\pm$  SD ( $n = 5$ , each group). (M and N) The transfection efficiencies of FOXP1 (M)

and FOXP2 (N) were evaluated with western blot. Data represent means  $\pm$  SD ( $n = 5$ , each group).  $**P < 0.01$  versus. FOXP1/FOXP2 (+) NC group,  $##P < 0.01$  versus. FOXP1/FOXP2 (-) NC group. (O) The transfection efficiency of AGGF1 was investigated with western blot. Data represent means  $\pm$  SD ( $n = 5$ , each group).  $**P < 0.01$  versus. AGGF1 (-) NC group.

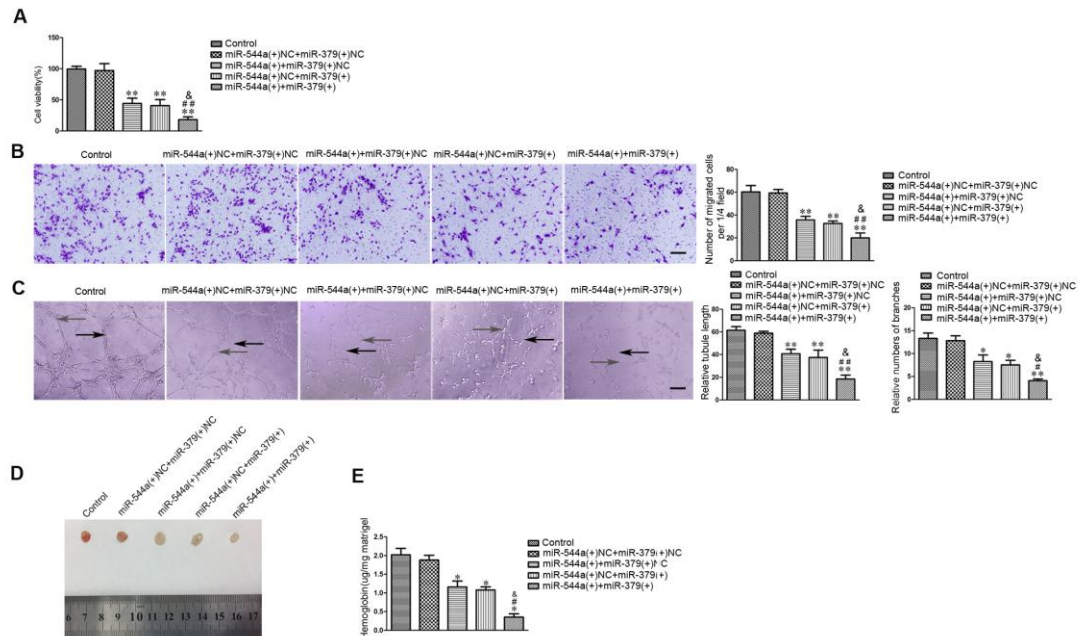

**Figure S2** The co-effects of miR-544a/miR-379 on the angiogenesis of U87 glioma *in vivo*. (A) The co-effects of miR-544a/miR-379 on the viability of GECs were evaluated by CCK8 assay. Values are means  $\pm$  SD ( $n = 3$ , each group).  $**P < 0.01$  versus. miR-544a (+) NC + miR-379 (+) NC group;  $##P < 0.01$  versus. miR-544a (+) + miR-379 (+) NC group.  $&P < 0.05$  versus. miR-544a (+) NC + miR-379 (+) group. (B) The co-effects of miR-544a/miR-379 on the migration of GECs was evaluated were evaluated by Transwell assay. Values are means  $\pm$  SD ( $n = 3$ , each group).  $**P < 0.01$  versus. miR-544a (+) NC + miR-379 (+) NC group;  $##P < 0.01$  versus. miR-544a (+) + miR-379 (+) NC group.  $&P < 0.05$  versus. miR-544a (+) NC + miR-379 (+) group. Scale bar represents 30  $\mu$ m. (C) The co-effects of miR-544a/miR-379 on the tube formation of GECs were evaluated by Matrigel tube formation assay (black arrow, tube structures; grey arrow, tube branches). Values are means  $\pm$  SD ( $n = 3$ , each group).  $*P < 0.05$ ,  $**P < 0.01$  versus. miR-544a (+) NC + miR-379 (+) NC group;  $#P < 0.05$ ,  $##P < 0.01$  versus. miR-544a (+) + miR-379 (+) NC group.  $&P < 0.05$  versus. miR-544a (+) NC + miR-379 (+) group. Scale bar represents 30  $\mu$ m. (D) The co-effects of miR-544a and miR-379 on the angiogenesis *in vivo* was evaluated by Matrigel plug assay. (E) The amount of hemoglobin was measured after combination of miR-544a and miR-379. Values are means  $\pm$  SD ( $n = 3$ , each group).  $*P < 0.05$  versus. miR-544a (+) NC + miR-379 (+) NC group;  $#P < 0.05$  versus. miR-544a (+) + miR-379 (+) NC group.  $&P < 0.05$  versus. miR-544a (+) NC + miR-379 (+) group.
